# Supplementary material for: Regulating glycolysis and heat shock proteins in Gannan yaks (&lt;i&gt;Bos&lt;/i&gt; &lt;i&gt;grunniens&lt;/i&gt;) in response to hypoxia of the Qinghai–Tibet Plateau
Source: Copernicus journal article supplement (doi:10.5194/aab-64-345-2021), 2021-08-19
Supplement: Supplementary file 1 [file aab-64-345-2021-supplement.zip]

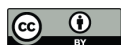

## *Supplement of*

# **Regulating glycolysis and heat shock proteins in Gannan yaks (*Bos grunniens*) in response to hypoxia of the Qinghai–Tibet Plateau**

**Yuliang Wen et al.**

*Correspondence to:* Jiang Hu ([huj@gsau.edu.cn](mailto:huj@gsau.edu.cn)) and Yuzhu Luo ([luoyz@gsau.edu.cn](mailto:luoyz@gsau.edu.cn))

- [aab-64-345-2021-supplement-title-page.pdf](#)
- [Figure S1.tif](#)

The copyright of individual parts of the supplement might differ from the article licence.
